# Supplementary figures and images for: Synthesis, characterization and redox chemistry of Ru(II) complexes of N-methyl pyridyl quinoxaline
Source: Royal Society of Chemistry journal article supplement (doi:10.1039/b903446c), 2009-01-01

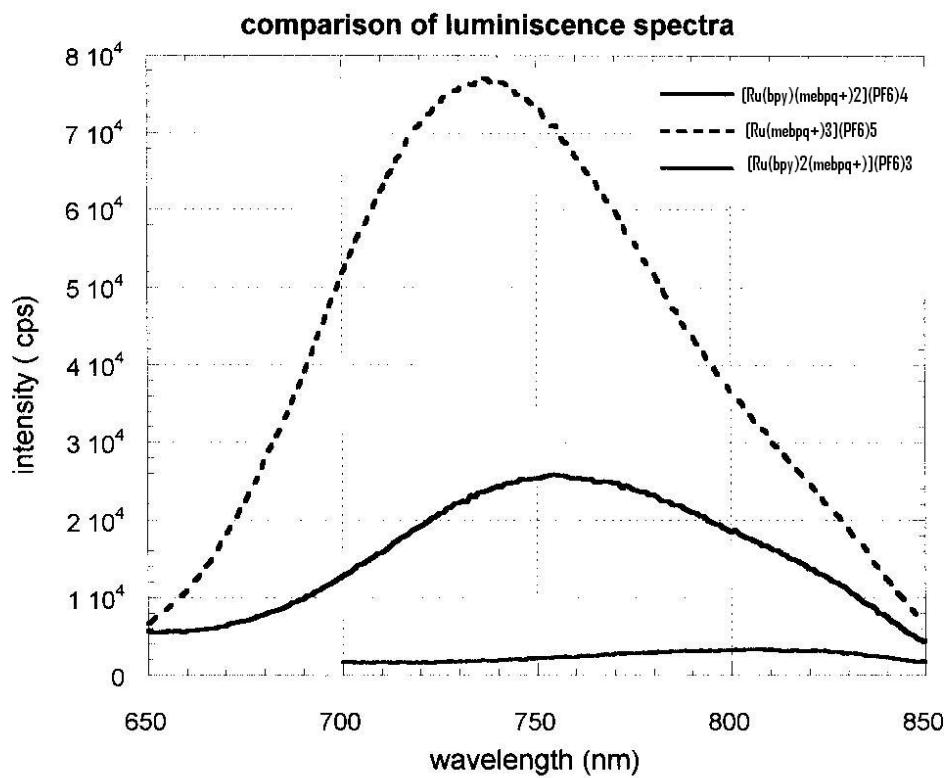

Supplement: b903446c.pdf [file b903446c.pdf]
